# Supplementary material for: Determining the ideal length of wind speed series for wind speed distribution and resource assessment
Source: Copernicus journal article supplement (doi:10.5194/wes-2025-25), 2025-02-27
Supplement: Supplementary file 1 [file wes-2025-25-supplement.pdf]

*Supplementary materials for*

## **Determining the ideal length of wind speed series for wind speed distribution and resource assessment**

Lihong Zhou<sup>1</sup>, Igor Esau<sup>1</sup>

<sup>1</sup>Department of Physics and Technology, Faculty of Science and Technology, The Arctic University of Norway, Tromsø, 9010, Norway

*Correspondence to:* Lihong Zhou ([lihong.zhou@uit.no](mailto:lihong.zhou@uit.no))

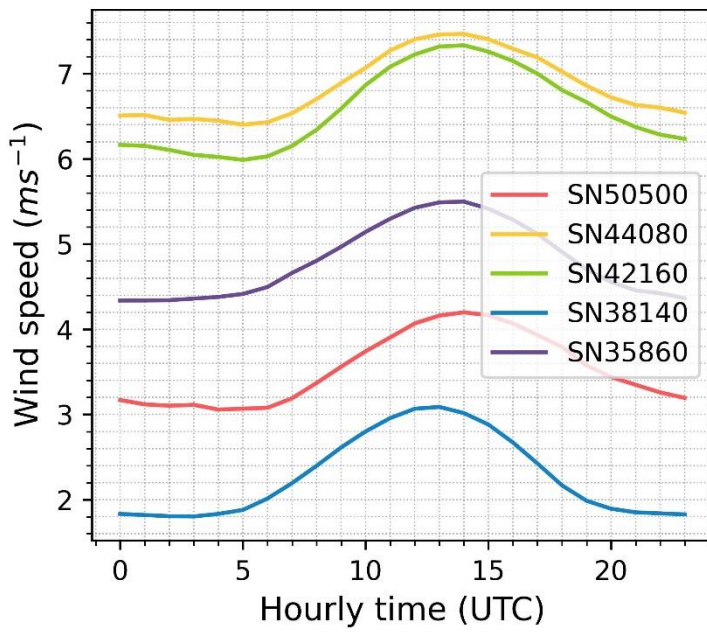

Figure S1 Mean wind speed at each time point across five stations, based on 16 years of hourly observations at each station.

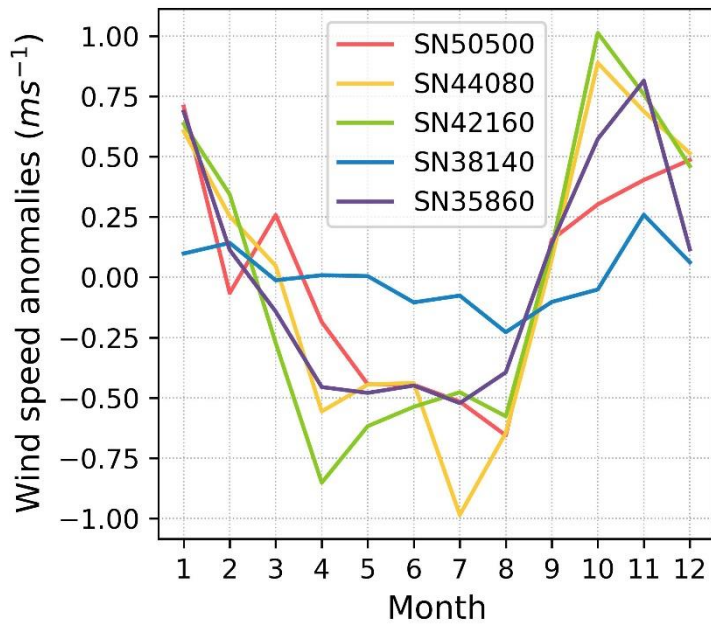

Figure S2 Mean wind speed anomalies (calculated as the mean monthly wind speed minus the annual mean wind speed) for each of the 12 months across five stations, based on 16 years of hourly observations at each station.

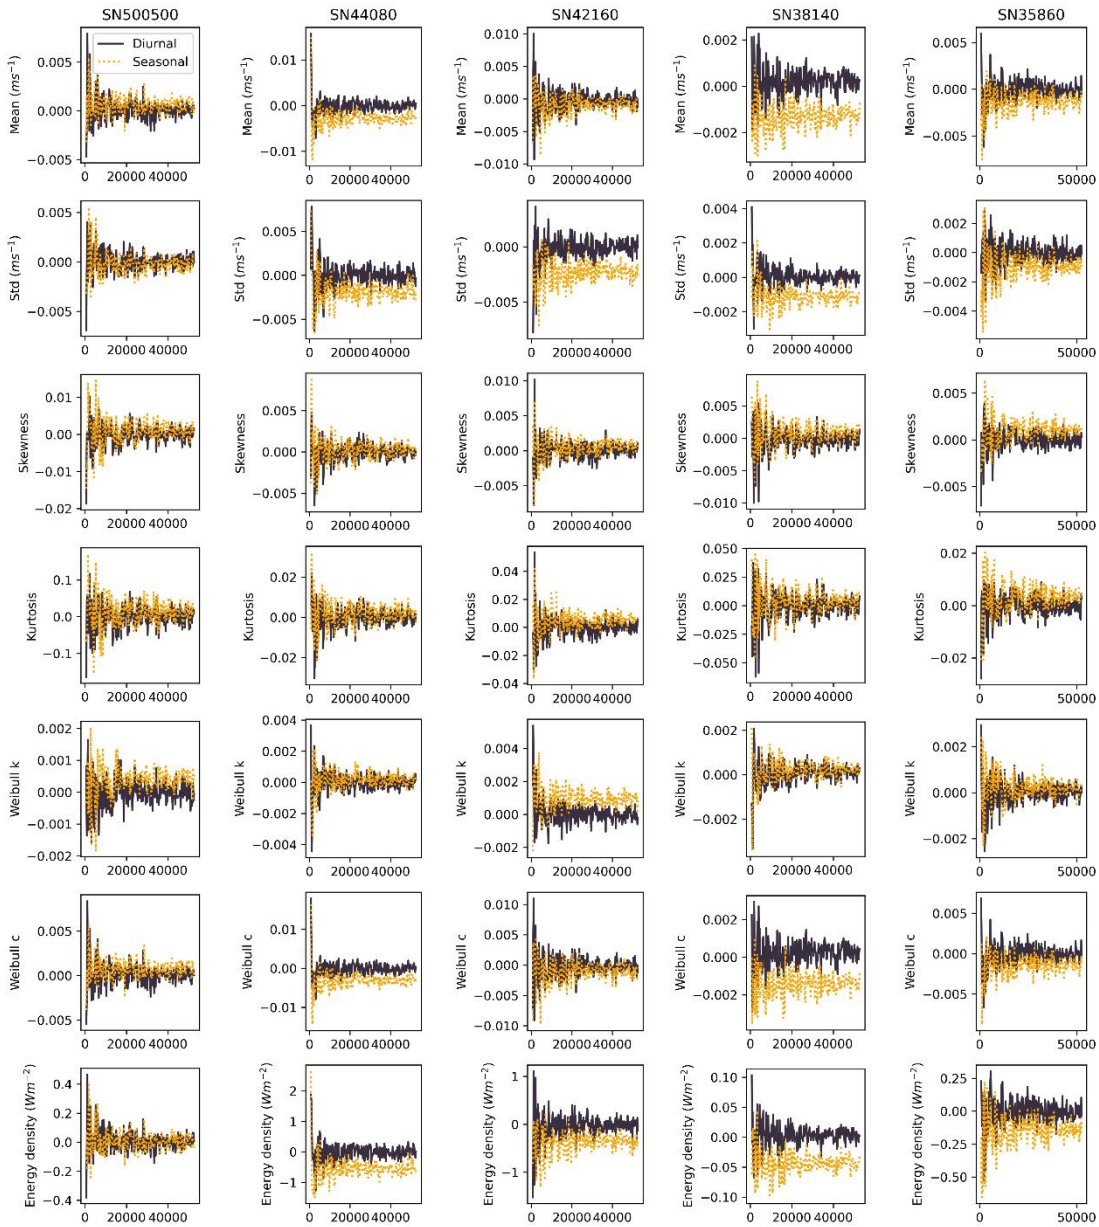

Figure S3 Differences in the 90% confidence intervals derived from in-situ observations between random sampling and diurnal-cycle-retained sampling (represented by black lines), and between random sampling and seasonality-retained sampling (represented by orange lines).

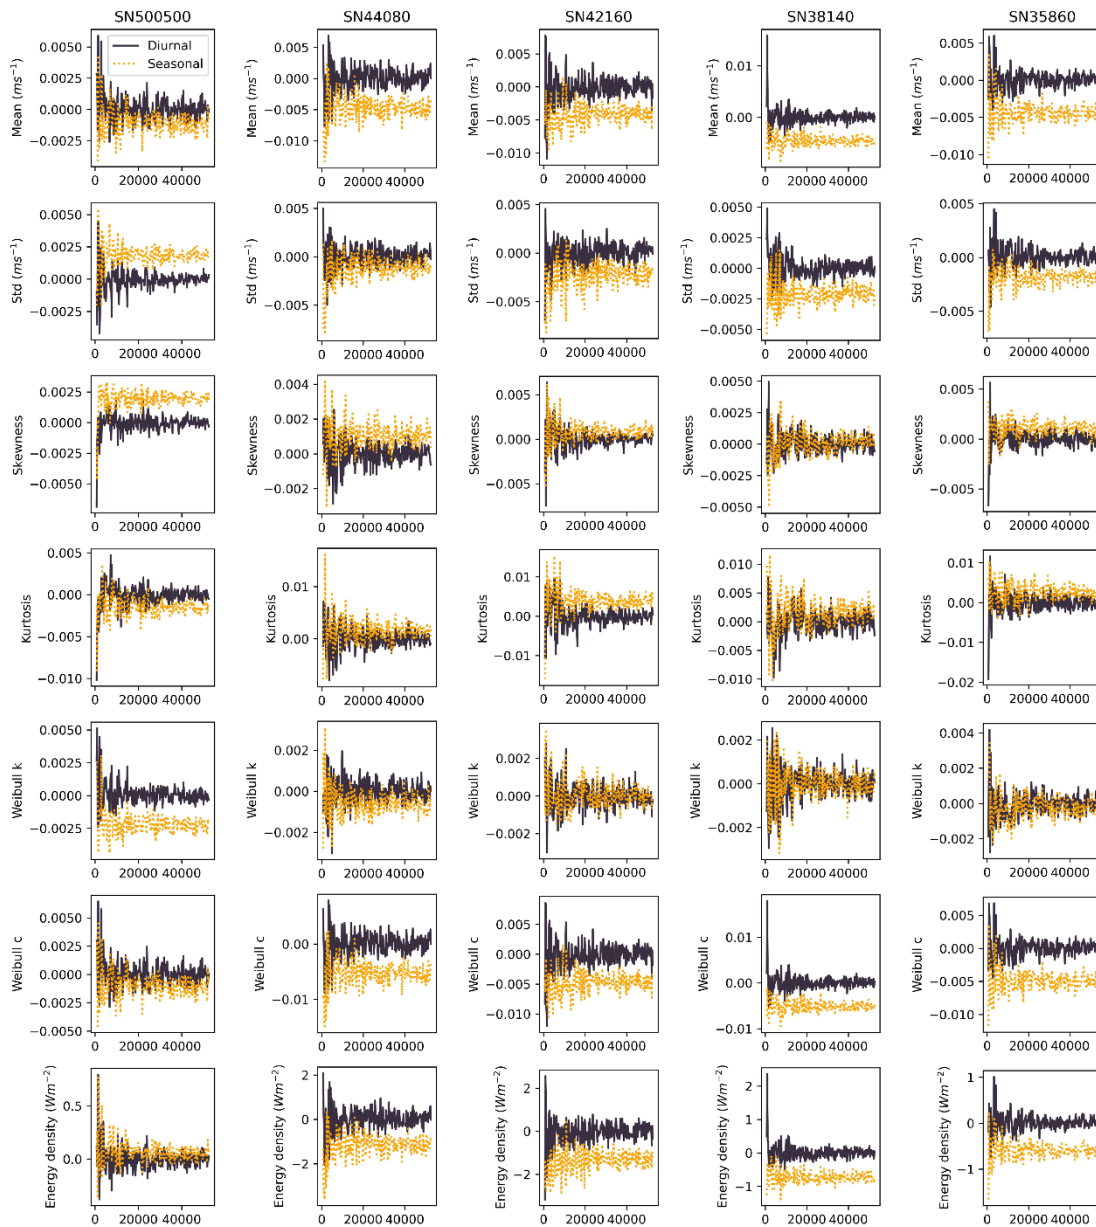

Figure S4 Same as Figure S3, but for ERA5 100-meter dataset.

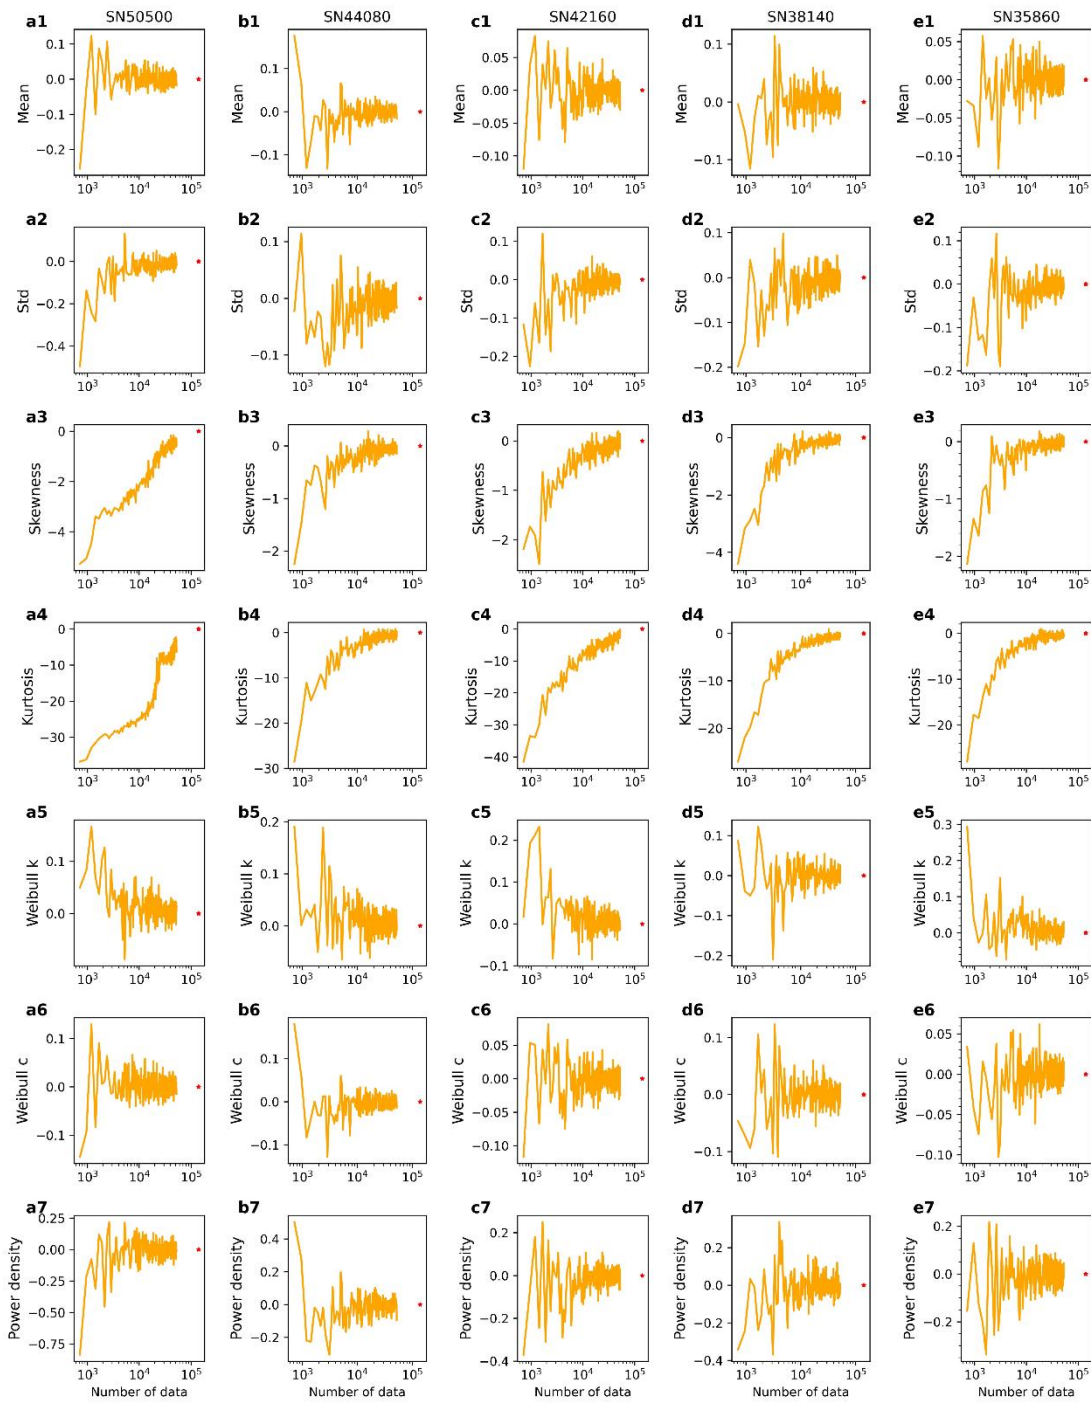

Figure S5 Relative percentage error of the median for each resampling group compared to the total time series value from in-situ weather observations.

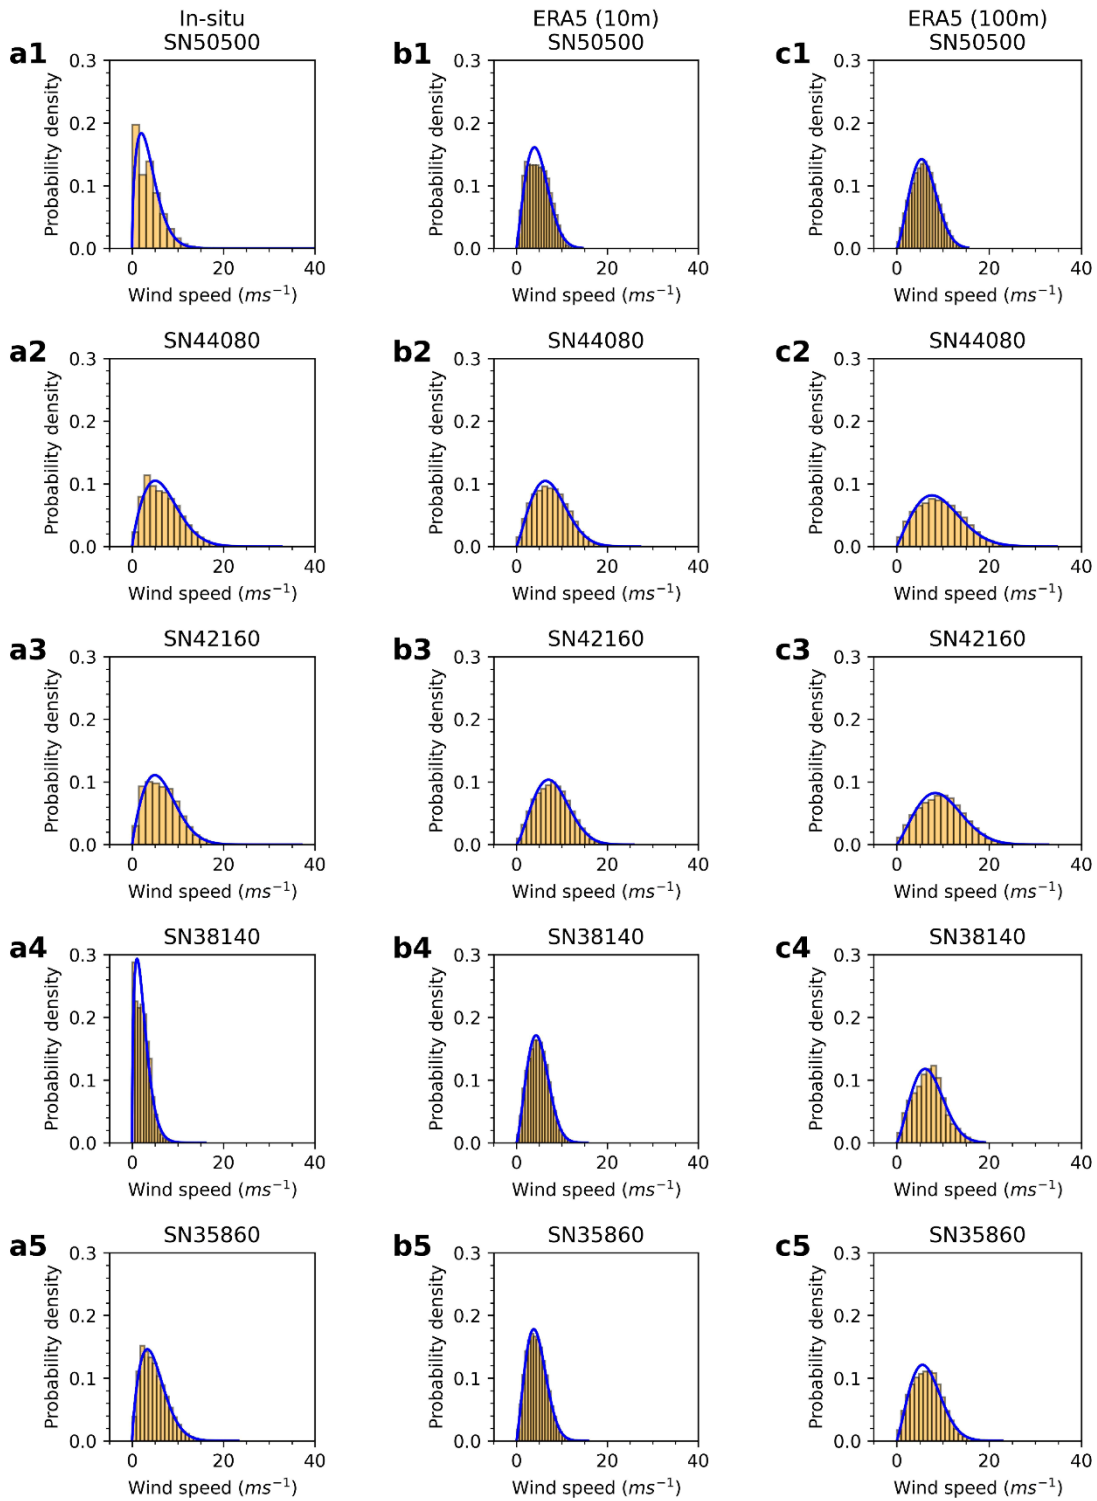

Figure S6 Wind speed distribution at five stations from both in-situ weather measurements and ERA5 reanalysis data (10m and 100m).

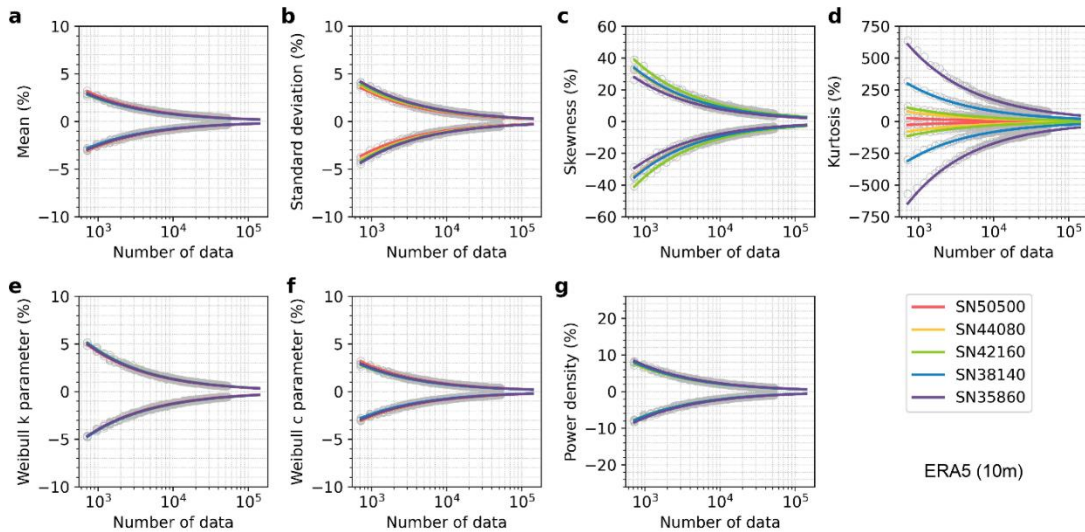

Figure S7 90% confidence intervals for the percent error in the mean, standard deviation, skewness, kurtosis, Weibull k and c parameters, and energy density, based on ERA5 10-meter dataset ranging from  $n = 720$  (30 days) to  $n = 140,160$  (16 years) across five stations. The fits to get the required data density are shown in Table S5.

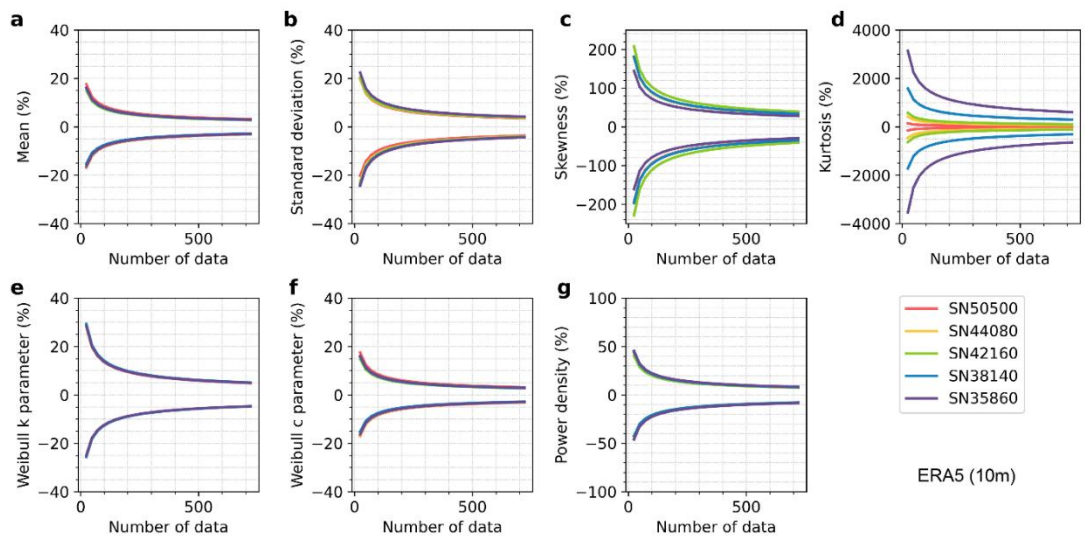

Figure S8 90% confidence intervals for the percent error in the mean, standard deviation, skewness, kurtosis, Weibull k and c parameters, and energy density, based on ERA5 10-meter dataset ranging from  $n = 24$  (1 day) to  $n = 720$  (30 days) across five stations. The fits to get the required data density are shown in Table S5.



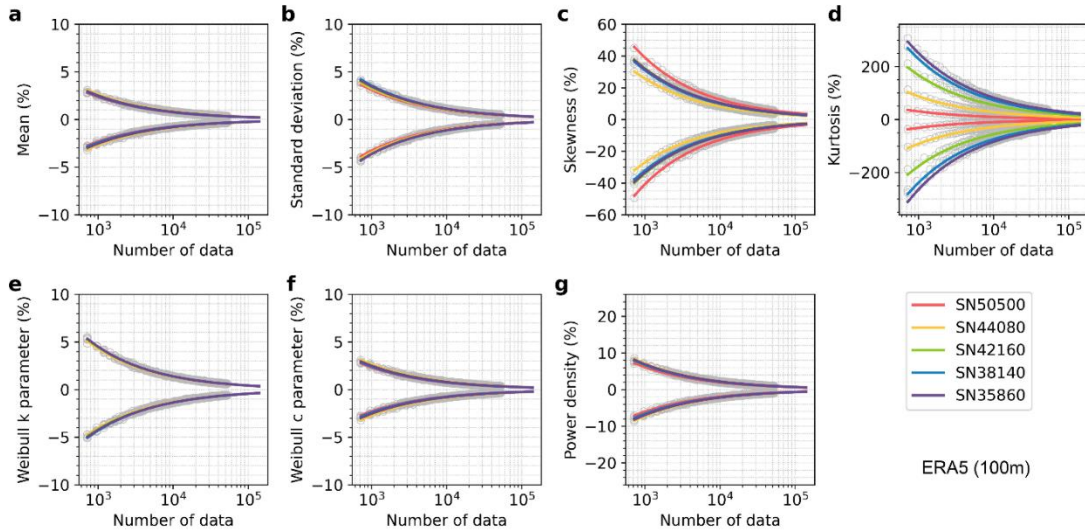

Figure S9 Same as Figure S7, but for ERA5 100-meter dataset. The fits to get the required data density are shown in Table S6.

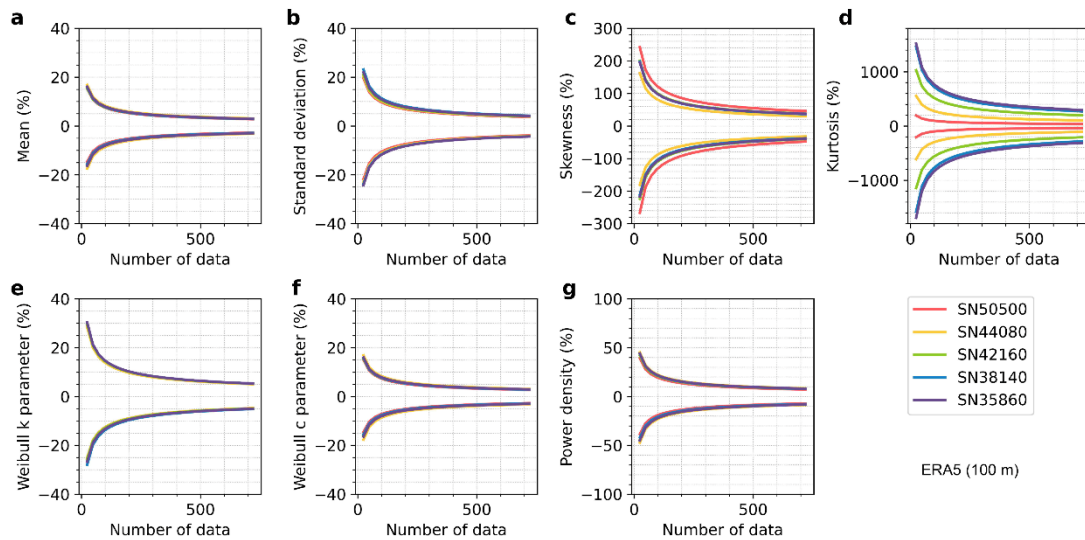

Figure S10 Same as Figure S8, but for ERA5 100-meter dataset. The fits to get the required data density are shown in Table S6.

Table S1. The selected years (Yr.) and the observation times (Obs. Tim.) for each station used in this study.

| SN38140 |           | SN35860 |           | SN42160 |           | SN44080 |           | SN50500 |           |
|---------|-----------|---------|-----------|---------|-----------|---------|-----------|---------|-----------|
| Yr.     | Obs. Tim. |
| 1996    | 8784      | 2001    | 8760      | 1998    | 8714      | 1995    | 8692      | 1974    | 8760      |
| 1998    | 8714      | 2002    | 8757      | 2000    | 8724      | 1996    | 8747      | 1975    | 8744      |
| 2002    | 8782      | 2003    | 8725      | 2001    | 8754      | 1997    | 8722      | 1976    | 8784      |
| 2003    | 8782      | 2004    | 8764      | 2002    | 8760      | 1998    | 8716      | 1977    | 8740      |
| 2004    | 8772      | 2008    | 8756      | 2004    | 8718      | 1999    | 8753      | 1978    | 8756      |
| 2009    | 8759      | 2009    | 8759      | 2008    | 8782      | 2000    | 8783      | 1979    | 8760      |
| 2010    | 8758      | 2010    | 8710      | 2009    | 8760      | 2001    | 8722      | 1980    | 8781      |
| 2011    | 8756      | 2014    | 8740      | 2010    | 8760      | 2002    | 8756      | 1981    | 8760      |
| 2012    | 8753      | 2015    | 8724      | 2011    | 8760      | 2003    | 8718      | 1982    | 8759      |
| 2014    | 8749      | 2016    | 8784      | 2012    | 8783      | 2004    | 8784      | 1983    | 8736      |
| 2015    | 8747      | 2017    | 8759      | 2013    | 8680      | 2006    | 8725      | 1984    | 8782      |
| 2017    | 8721      | 2018    | 8759      | 2016    | 8763      | 2009    | 8757      | 1985    | 8751      |
| 2018    | 8719      | 2019    | 8759      | 2018    | 8685      | 2010    | 8760      | 1986    | 8750      |
| 2019    | 8706      | 2020    | 8783      | 2020    | 8748      | 2011    | 8636      | 1987    | 8753      |
| 2020    | 8685      | 2021    | 8760      | 2022    | 8750      | 2012    | 8648      | 1988    | 8775      |
| 2021    | 8678      | 2022    | 8711      | 2023    | 8728      | 2013    | 8689      | 1990    | 8740      |

Table S2. Root mean squared error (RMSE) values derived from in-situ observations, comparing random sampling with diurnal cycle-retained sampling (Diurnal) and seasonality-retained sampling (Seasonal).

| In-situ observations |          | SN50500 | SN44080 | SN42160 | SN38140 | SN35860 | Average |
|----------------------|----------|---------|---------|---------|---------|---------|---------|
| Mean                 | Diurnal  | 0.0023  | 0.0026  | 0.0025  | 0.0013  | 0.0018  | 0.0021  |
|                      | Seasonal | 0.0023  | 0.004   | 0.0025  | 0.0016  | 0.0022  | 0.0025  |
| Std. dev             | Diurnal  | 0.0016  | 0.0019  | 0.0018  | 0.001   | 0.0013  | 0.0015  |
|                      | Seasonal | 0.0021  | 0.0027  | 0.0028  | 0.0014  | 0.0017  | 0.0021  |
| Skewness             | Diurnal  | 0.0083  | 0.002   | 0.0024  | 0.0029  | 0.0018  | 0.0035  |
|                      | Seasonal | 0.0075  | 0.0022  | 0.0025  | 0.0032  | 0.0022  | 0.0035  |
| Kurtosis             | Diurnal  | 0.1229  | 0.0106  | 0.0193  | 0.021   | 0.0084  | 0.0364  |
|                      | Seasonal | 0.1138  | 0.0113  | 0.0233  | 0.023   | 0.0084  | 0.0360  |
| Shape k              | Diurnal  | 0.0007  | 0.0009  | 0.001   | 0.0008  | 0.0008  | 0.0008  |
|                      | Seasonal | 0.0009  | 0.0008  | 0.0014  | 0.0008  | 0.0008  | 0.0009  |
| Scale c              | Diurnal  | 0.0025  | 0.0029  | 0.0028  | 0.0016  | 0.0021  | 0.0024  |
|                      | Seasonal | 0.0024  | 0.0045  | 0.0029  | 0.0018  | 0.0025  | 0.0028  |
| Power density        | Diurnal  | 0.1396  | 0.4855  | 0.3858  | 0.0292  | 0.1589  | 0.2398  |
|                      | Seasonal | 0.1687  | 0.7466  | 0.5161  | 0.0498  | 0.2311  | 0.3425  |

Table S3. Same as Table S2, but for ERA5 100-meter dataset.

| ERA5 100-meter |          | SN50500 | SN44080 | SN42160 | SN38140 | SN35860 | Average |
|----------------|----------|---------|---------|---------|---------|---------|---------|
| Mean           | Diurnal  | 0.0016  | 0.0027  | 0.0029  | 0.0023  | 0.0019  | 0.0023  |
|                | Seasonal | 0.0105  | 0.0057  | 0.0051  | 0.005   | 0.005   | 0.0063  |
| Std. dev       | Diurnal  | 0.0011  | 0.0019  | 0.0018  | 0.0014  | 0.0013  | 0.0015  |
|                | Seasonal | 0.0028  | 0.0022  | 0.0031  | 0.0024  | 0.0022  | 0.0025  |
| Skewness       | Diurnal  | 0.0012  | 0.0013  | 0.0015  | 0.0014  | 0.0015  | 0.0014  |
|                | Seasonal | 0.0025  | 0.0016  | 0.0017  | 0.0015  | 0.0018  | 0.0018  |
| Kurtosis       | Diurnal  | 0.0021  | 0.003   | 0.004   | 0.0037  | 0.0044  | 0.0034  |
|                | Seasonal | 0.0029  | 0.0038  | 0.0056  | 0.0044  | 0.0052  | 0.0044  |
| Shape k        | Diurnal  | 0.0012  | 0.0011  | 0.0012  | 0.0013  | 0.0011  | 0.0012  |
|                | Seasonal | 0.0033  | 0.0012  | 0.0011  | 0.0013  | 0.0011  | 0.0016  |
| Scale c        | Diurnal  | 0.0018  | 0.0031  | 0.0032  | 0.0025  | 0.0022  | 0.0026  |
|                | Seasonal | 0.0116  | 0.0064  | 0.0058  | 0.0056  | 0.0055  | 0.0070  |
| Power density  | Diurnal  | 0.1552  | 0.7918  | 0.8559  | 0.31    | 0.2731  | 0.4772  |
|                | Seasonal | 0.8931  | 1.4477  | 1.6094  | 0.7847  | 0.6521  | 1.0774  |

**Table S4. Equations relating percent error (Y) within 90% confidence intervals to number of data points (n), using data ranging from n = 720 to 52,560. P denotes the positive error bar, and N represents the negative error bar.**

| Parameters        | SN50500                       | SN44080                       | SN42160                       | SN38140                       | SN35860                       |
|-------------------|-------------------------------|-------------------------------|-------------------------------|-------------------------------|-------------------------------|
| Mean (P)          | $Y=\exp[-0.507\ln(n)+4.888]$  | $Y=\exp[-0.503\ln(n)+4.579]$  | $Y=\exp[-0.497\ln(n)+4.497]$  | $Y=\exp[-0.496\ln(n)+4.724]$  | $Y=\exp[-0.494\ln(n)+4.536]$  |
| Mean (N)          | $Y=-\exp[-0.511\ln(n)+4.929]$ | $Y=-\exp[-0.494\ln(n)+4.491]$ | $Y=-\exp[-0.498\ln(n)+4.504]$ | $Y=-\exp[-0.500\ln(n)+4.758]$ | $Y=-\exp[-0.501\ln(n)+4.601]$ |
| Std. dev (P)      | $Y=\exp[-0.497\ln(n)+5.045]$  | $Y=\exp[-0.503\ln(n)+4.579]$  | $Y=\exp[-0.486\ln(n)+4.692]$  | $Y=\exp[-0.497\ln(n)+4.971]$  | $Y=\exp[-0.489\ln(n)+4.748]$  |
| Std. dev (N)      | $Y=-\exp[-0.509\ln(n)+5.169]$ | $Y=-\exp[-0.494\ln(n)+4.491]$ | $Y=-\exp[-0.500\ln(n)+4.838]$ | $Y=-\exp[-0.503\ln(n)+5.033]$ | $Y=-\exp[-0.504\ln(n)+4.904]$ |
| Skewness (P)      | $Y=\exp[-0.452\ln(n)+6.610]$  | $Y=\exp[-0.495\ln(n)+6.434]$  | $Y=\exp[-0.483\ln(n)+6.523]$  | $Y=\exp[-0.482\ln(n)+6.579]$  | $Y=\exp[-0.488\ln(n)+6.254]$  |
| Skewness (N)      | $Y=-\exp[-0.471\ln(n)+6.807]$ | $Y=-\exp[-0.502\ln(n)+6.522]$ | $Y=-\exp[-0.496\ln(n)+6.665]$ | $Y=-\exp[-0.506\ln(n)+6.825]$ | $Y=-\exp[-0.509\ln(n)+6.475]$ |
| Kurtosis (P)      | $Y=\exp[-0.436\ln(n)+8.521]$  | $Y=\exp[-0.493\ln(n)+8.449]$  | $Y=\exp[-0.474\ln(n)+8.746]$  | $Y=\exp[-0.469\ln(n)+7.971]$  | $Y=\exp[-0.488\ln(n)+8.273]$  |
| Kurtosis (N)      | $Y=-\exp[-0.451\ln(n)+8.673]$ | $Y=-\exp[-0.500\ln(n)+8.540]$ | $Y=-\exp[-0.485\ln(n)+8.869]$ | $Y=-\exp[-0.496\ln(n)+8.254]$ | $Y=-\exp[-0.507\ln(n)+8.472]$ |
| Weibull k (P)     | $Y=\exp[-0.508\ln(n)+4.902]$  | $Y=\exp[-0.503\ln(n)+4.845]$  | $Y=\exp[-0.503\ln(n)+4.907]$  | $Y=\exp[-0.509\ln(n)+4.994]$  | $Y=\exp[-0.511\ln(n)+4.919]$  |
| Weibull k (N)     | $Y=-\exp[-0.491\ln(n)+4.721]$ | $Y=-\exp[-0.493\ln(n)+4.731]$ | $Y=-\exp[-0.484\ln(n)+4.696]$ | $Y=-\exp[-0.501\ln(n)+4.906]$ | $Y=-\exp[-0.493\ln(n)+4.735]$ |
| Weibull c (P)     | $Y=\exp[-0.507\ln(n)+4.864]$  | $Y=\exp[-0.503\ln(n)+4.580]$  | $Y=\exp[-0.496\ln(n)+4.494]$  | $Y=\exp[-0.497\ln(n)+4.782]$  | $Y=\exp[-0.494\ln(n)+4.55]$   |
| Weibull c (N)     | $Y=-\exp[-0.512\ln(n)+4.906]$ | $Y=-\exp[-0.495\ln(n)+4.505]$ | $Y=-\exp[-0.498\ln(n)+4.506]$ | $Y=-\exp[-0.501\ln(n)+4.824]$ | $Y=-\exp[-0.501\ln(n)+4.619]$ |
| Power density (P) | $Y=\exp[-0.508\ln(n)+6.011]$  | $Y=\exp[-0.505\ln(n)+5.689]$  | $Y=\exp[-0.495\ln(n)+5.547]$  | $Y=\exp[-0.500\ln(n)+5.854]$  | $Y=\exp[-0.493\ln(n)+5.614]$  |
| Power density (N) | $Y=-\exp[-0.509\ln(n)+6.014]$ | $Y=-\exp[-0.492\ln(n)+5.560]$ | $Y=-\exp[-0.497\ln(n)+5.566]$ | $Y=-\exp[-0.497\ln(n)+5.813]$ | $Y=-\exp[-0.51\ln(n)+5.674]$  |

**Table S5. Equations for the ERA5 10-meter dataset relate percent error (Y) within 90% confidence intervals to the number of data points (n), for values of n between 720 and 52,560. P represents the positive error bar and N represents the negative error bar.**

| Parameters        | SN50500                       | SN44080                       | SN42160                       | SN38140                       | SN35860                       |
|-------------------|-------------------------------|-------------------------------|-------------------------------|-------------------------------|-------------------------------|
| Mean (P)          | $Y=\exp[-0.505\ln(n)+4.47]$   | $Y=\exp[-0.496\ln(n)+4.356]$  | $Y=\exp[-0.494\ln(n)+4.275]$  | $Y=\exp[-0.504\ln(n)+4.368]$  | $Y=\exp[-0.498\ln(n)+4.365]$  |
| Mean (N)          | $Y=-\exp[-0.499\ln(n)+4.413]$ | $Y=-\exp[-0.501\ln(n)+4.404]$ | $Y=-\exp[-0.498\ln(n)+4.316]$ | $Y=-\exp[-0.498\ln(n)+4.304]$ | $Y=-\exp[-0.5\ln(n)+4.38]$    |
| Std. dev (P)      | $Y=\exp[-0.504\ln(n)+4.576]$  | $Y=\exp[-0.488\ln(n)+4.535]$  | $Y=\exp[-0.489\ln(n)+4.568]$  | $Y=\exp[-0.497\ln(n)+4.688]$  | $Y=\exp[-0.493\ln(n)+4.671]$  |
| Std. dev (N)      | $Y=-\exp[-0.506\ln(n)+4.61]$  | $Y=-\exp[-0.506\ln(n)+4.711]$ | $Y=-\exp[-0.507\ln(n)+4.754]$ | $Y=-\exp[-0.505\ln(n)+4.775]$ | $Y=-\exp[-0.506\ln(n)+4.802]$ |
| Skewness (P)      | $Y=\exp[-0.497\ln(n)+6.767]$  | $Y=\exp[-0.494\ln(n)+6.749]$  | $Y=\exp[-0.492\ln(n)+6.901]$  | $Y=\exp[-0.493\ln(n)+6.766]$  | $Y=\exp[-0.484\ln(n)+6.511]$  |
| Skewness (N)      | $Y=-\exp[-0.508\ln(n)+6.875]$ | $Y=-\exp[-0.508\ln(n)+6.891]$ | $Y=-\exp[-0.505\ln(n)+7.038]$ | $Y=-\exp[-0.505\ln(n)+6.887]$ | $Y=-\exp[-0.5\ln(n)+6.67]$    |
| Kurtosis (P)      | $Y=\exp[-0.499\ln(n)+6.546]$  | $Y=\exp[-0.497\ln(n)+7.613]$  | $Y=\exp[-0.489\ln(n)+7.91]$   | $Y=\exp[-0.492\ln(n)+8.935]$  | $Y=\exp[-0.483\ln(n)+9.587]$  |
| Kurtosis (N)      | $Y=-\exp[-0.504\ln(n)+6.598]$ | $Y=-\exp[-0.507\ln(n)+7.717]$ | $Y=-\exp[-0.502\ln(n)+8.044]$ | $Y=-\exp[-0.503\ln(n)+9.046]$ | $Y=-\exp[-0.5\ln(n)+9.762]$   |
| Weibull k (P)     | $Y=\exp[-0.512\ln(n)+4.962]$  | $Y=\exp[-0.506\ln(n)+4.943]$  | $Y=\exp[-0.508\ln(n)+4.979]$  | $Y=\exp[-0.514\ln(n)+5.011]$  | $Y=\exp[-0.512\ln(n)+4.973]$  |
| Weibull k (N)     | $Y=-\exp[-0.502\ln(n)+4.839]$ | $Y=-\exp[-0.489\ln(n)+4.767]$ | $Y=-\exp[-0.488\ln(n)+4.771]$ | $Y=-\exp[-0.494\ln(n)+4.808]$ | $Y=-\exp[-0.493\ln(n)+4.779]$ |
| Weibull c (P)     | $Y=\exp[-0.504\ln(n)+4.463]$  | $Y=\exp[-0.495\ln(n)+4.348]$  | $Y=\exp[-0.494\ln(n)+4.261]$  | $Y=\exp[-0.504\ln(n)+4.353]$  | $Y=\exp[-0.498\ln(n)+4.36]$   |
| Weibull c (N)     | $Y=-\exp[-0.5\ln(n)+4.419]$   | $Y=-\exp[-0.502\ln(n)+4.41]$  | $Y=-\exp[-0.499\ln(n)+4.313]$ | $Y=-\exp[-0.498\ln(n)+4.301]$ | $Y=-\exp[-0.5\ln(n)+4.378]$   |
| Power density (P) | $Y=\exp[-0.506\ln(n)+5.416]$  | $Y=\exp[-0.495\ln(n)+5.329]$  | $Y=\exp[-0.493\ln(n)+5.266]$  | $Y=\exp[-0.503\ln(n)+5.384]$  | $Y=\exp[-0.497\ln(n)+5.398]$  |
| Power density (N) | $Y=-\exp[-0.498\ln(n)+5.332]$ | $Y=-\exp[-0.502\ln(n)+5.393]$ | $Y=-\exp[-0.5\ln(n)+5.33]$    | $Y=-\exp[-0.497\ln(n)+5.326]$ | $Y=-\exp[-0.499\ln(n)+5.413]$ |

**Table S6. Same as Table S2, but for ERA5 100-meter dataset.**

| Parameters        | SN50500                       | SN44080                       | SN42160                       | SN38140                       | SN35860                       |
|-------------------|-------------------------------|-------------------------------|-------------------------------|-------------------------------|-------------------------------|
| Mean (P)          | $Y=\exp[-0.51\ln(n)+4.315]$   | $Y=\exp[-0.497\ln(n)+4.402]$  | $Y=\exp[-0.494\ln(n)+4.305]$  | $Y=\exp[-0.502\ln(n)+4.357]$  | $Y=\exp[-0.498\ln(n)+4.361]$  |
| Mean (N)          | $Y=-\exp[-0.495\ln(n)+4.254]$ | $Y=-\exp[-0.503\ln(n)+4.458]$ | $Y=-\exp[-0.498\ln(n)+4.354]$ | $Y=-\exp[-0.51\ln(n)+4.335]$  | $Y=-\exp[-0.501\ln(n)+4.383]$ |
| Std. dev (P)      | $Y=\exp[-0.492\ln(n)+4.533]$  | $Y=\exp[-0.489\ln(n)+4.559]$  | $Y=\exp[-0.489\ln(n)+4.593]$  | $Y=\exp[-0.501\ln(n)+4.731]$  | $Y=\exp[-0.493\ln(n)+4.656]$  |
| Std. dev (N)      | $Y=-\exp[-0.506\ln(n)+4.685]$ | $Y=-\exp[-0.506\ln(n)+4.739]$ | $Y=-\exp[-0.507\ln(n)+4.783]$ | $Y=-\exp[-0.503\ln(n)+4.76]$  | $Y=-\exp[-0.508\ln(n)+4.803]$ |
| Skewness (P)      | $Y=\exp[-0.49\ln(n)+7.047]$   | $Y=\exp[-0.494\ln(n)+6.659]$  | $Y=\exp[-0.49\ln(n)+6.854]$   | $Y=\exp[-0.497\ln(n)+6.868]$  | $Y=\exp[-0.486\ln(n)+6.817]$  |
| Skewness (N)      | $Y=-\exp[-0.504\ln(n)+7.187]$ | $Y=-\exp[-0.509\ln(n)+6.815]$ | $Y=-\exp[-0.505\ln(n)+7.015]$ | $Y=-\exp[-0.505\ln(n)+6.958]$ | $Y=-\exp[-0.501\ln(n)+6.972]$ |
| Kurtosis (P)      | $Y=\exp[-0.495\ln(n)+6.837]$  | $Y=\exp[-0.494\ln(n)+7.888]$  | $Y=\exp[-0.486\ln(n)+8.482]$  | $Y=\exp[-0.496\ln(n)+8.86]$   | $Y=\exp[-0.483\ln(n)+8.858]$  |
| Kurtosis (N)      | $Y=-\exp[-0.504\ln(n)+6.93]$  | $Y=-\exp[-0.508\ln(n)+8.03]$  | $Y=-\exp[-0.501\ln(n)+8.633]$ | $Y=-\exp[-0.506\ln(n)+8.974]$ | $Y=-\exp[-0.498\ln(n)+9.015]$ |
| Weibull k (P)     | $Y=\exp[-0.511\ln(n)+5.007]$  | $Y=\exp[-0.506\ln(n)+4.955]$  | $Y=\exp[-0.507\ln(n)+5.002]$  | $Y=\exp[-0.511\ln(n)+5.037]$  | $Y=\exp[-0.512\ln(n)+5.041]$  |
| Weibull k (N)     | $Y=-\exp[-0.489\ln(n)+4.776]$ | $Y=-\exp[-0.489\ln(n)+4.78]$  | $Y=\exp[-0.493\ln(n)+4.298]$  | $Y=-\exp[-0.502\ln(n)+4.924]$ | $Y=-\exp[-0.493\ln(n)+4.849]$ |
| Weibull c (P)     | $Y=\exp[-0.5\ln(n)+4.293]$    | $Y=\exp[-0.496\ln(n)+4.404]$  | $Y=-\exp[-0.499\ln(n)+4.358]$ | $Y=\exp[-0.502\ln(n)+4.347]$  | $Y=\exp[-0.497\ln(n)+4.352]$  |
| Weibull c (N)     | $Y=-\exp[-0.495\ln(n)+4.249]$ | $Y=-\exp[-0.503\ln(n)+4.468]$ | $Y=\exp[-0.493\ln(n)+5.305]$  | $Y=-\exp[-0.51\ln(n)+4.333]$  | $Y=-\exp[-0.501\ln(n)+4.387]$ |
| Power density (P) | $Y=\exp[-0.499\ln(n)+5.256]$  | $Y=\exp[-0.496\ln(n)+5.385]$  | $Y=-\exp[-0.501\ln(n)+5.382]$ | $Y=\exp[-0.502\ln(n)+5.376]$  | $Y=\exp[-0.496\ln(n)+5.362]$  |
| Power density (N) | $Y=-\exp[-0.496\ln(n)+5.225]$ | $Y=-\exp[-0.503\ln(n)+5.451]$ | $Y=\exp[-0.494\ln(n)+4.305]$  | $Y=-\exp[-0.496\ln(n)+5.312]$ | $Y=-\exp[-0.501\ln(n)+5.396]$ |
